# Supplementary material for: Volatile Compound Markers in Beef Irradiated with Accelerated Electrons
Source: MDPI journal article supplement (doi:10.3390/molecules29050940), 2024-02-21
Supplement: s1 [file s1]

**Table S1.** Concentration of the identified compounds in the beef samples analyzed after irradiation during 4 days of storage at 4 °C (mg/kg); n=3 - number of repeats, relative error was 20% with confidence level P=0.95.

| Category  | Compound            | Dose (kGy) | Storage time (day) |       |       |       |        |
|-----------|---------------------|------------|--------------------|-------|-------|-------|--------|
|           |                     |            | 0                  | 1     | 2     | 3     | 4      |
| Aldehydes | Acetaldehyde        | 0          | 24.8               | 8.8   | 2.9   | 0.45  | 0.67   |
|           |                     | 0.25       | 23.45              | 15.6  | 10.9  | 0.073 | 0.85   |
|           |                     | 0.5        | 20.9               | 21.1  | 14.7  | 0.41  | 0.95   |
|           |                     | 1          | 19.4               | 17.9  | 3.0   | 0.42  | 0.54   |
|           |                     | 5          | 25.0               | 15.4  | 18.7  | 4.1   | 1.1    |
|           | Propanal, 2-methyl- | 0          | 0.31               | 0.14  | ND    | ND    | ND     |
|           |                     | 0.25       | 0.43               | 0.31  | ND    | ND    | ND     |
|           |                     | 0.5        | 0.24               | 0.38  | 0.18  | ND    | ND     |
|           |                     | 1          | 0.28               | 0.31  | 0.19  | ND    | ND     |
|           |                     | 5          | 0.62               | 0.52  | 0.48  | 0.18  | 0.2    |
|           | Butanal, 3-methyl-  | 0          | ND                 | ND    | ND    | ND    | ND     |
|           |                     | 0.25       | 0.08               | ND    | ND    | ND    | ND     |
|           |                     | 0.5        | 0.062              | 0.14  | ND    | ND    | ND     |
|           |                     | 1          | 0.19               | 0.22  | ND    | ND    | ND     |
|           |                     | 5          | 0.45               | 0.28  | 0.48  | 0.33  | 0.14   |
|           | Pentanal            | 0          | 0.031              | 0.053 | 0.037 | ND    | 0.0042 |
|           |                     | 0.25       | 0.084              | 0.12  | 0.092 | 0.017 | 0.011  |
|           |                     | 0.5        | 0.17               | 0.19  | 0.27  | ND    | 0.021  |
|           |                     | 1          | 0.12               | 0.31  | 0.29  | 0.02  | 0.038  |
|           |                     | 5          | 0.19               | 0.24  | 0.42  | 0.11  | 0.055  |
|           | Hexanal             | 0          | 0.30               | 0.57  | 0.64  | 0.066 | 0.14   |
|           |                     | 0.25       | 0.75               | 1.2   | 1.2   | 0.27  | 0.22   |
|           |                     | 0.5        | 1.2                | 1.9   | 2.5   | 0.41  | 0.33   |
|           |                     | 1          | 0.83               | 3.0   | 3.2   | 0.57  | 0.57   |
|           |                     | 5          | 2.2                | 3.5   | 6.9   | 2.5   | 1.2    |
|           | Heptanal            | 0          | 0.20               | 0.33  | 0.23  | 0.45  | 0.097  |
|           |                     | 0.25       | 0.67               | 0.8   | 0.66  | 0.14  | 0.15   |
|           |                     | 0.5        | 1.3                | 1.2   | 1.8   | 0.19  | 0.22   |
|           |                     | 1          | 0.81               | 1.7   | 2.1   | 0.22  | 0.39   |
|           |                     | 5          | 1.1                | 1.2   | 1.9   | 0.72  | 0.5    |
|           | Octanal             | 0          | ND                 | 0.045 | 0.14  | ND    | ND     |
|           |                     | 0.25       | 0.27               | 0.31  | 0.3   | ND    | ND     |
|           |                     | 0.5        | 0.38               | 3.7   | 0.59  | ND    | ND     |
|           |                     | 1          | 0.24               | 0.58  | 0.67  | ND    | 0.11   |
|           |                     | 5          | 0.43               | 0.43  | 0.72  | 0.26  | 0.24   |
|           | Nonanal             | 0          | 0.095              | 0.033 | 0.15  | ND    | ND     |
|           |                     | 0.25       | 0.28               | 0.21  | 0.23  | ND    | ND     |
|           |                     | 0.5        | 0.39               | 0.77  | 0.48  | 0.10  | 0.091  |
|           |                     | 1          | 0.3                | 0.44  | 0.58  | 0.15  | 0.21   |
|           |                     | 5          | 0.56               | 0.47  | 0.71  | 0.34  | 0.31   |

|          |                       |      |       |       |       |       |       |
|----------|-----------------------|------|-------|-------|-------|-------|-------|
| Alcohols | Ethanol               | 0    | 0.033 | 0.044 | 0.54  | 2.3   | 9.4   |
|          |                       | 0.25 | 0.11  | 0.088 | 0.31  | 1.4   | 4.6   |
|          |                       | 0.5  | 0.061 | 0.056 | 0.17  | 2.1   | 3.2   |
|          |                       | 1    | 0.034 | 0.13  | 0.18  | 1.9   | 6.4   |
|          |                       | 5    | 0.18  | 0.17  | 0.12  | 1.1   | 3.0   |
|          | 1-butanol, 3-methyl-  | 0    | ND    | ND    | 1.4   | 0.6   | 1.5   |
|          |                       | 0.25 | ND    | ND    | 1.2   | 1.7   | 1.1   |
|          |                       | 0.5  | ND    | ND    | 0.82  | 1.2   | 0.69  |
|          |                       | 1    | ND    | ND    | 1.2   | 1.5   | 1.3   |
|          |                       | 5    | ND    | ND    | ND    | 2.0   | 1.5   |
|          | 1-butanol, 2-methyl-  | 0    | ND    | ND    | 0.2   | ND    | 0.25  |
|          |                       | 0.25 | ND    | ND    | 0.25  | ND    | 0.19  |
|          |                       | 0.5  | ND    | ND    | 0.38  | 0.18  | 0.13  |
|          |                       | 1    | ND    | ND    | 0.77  | 0.33  | 0.18  |
|          |                       | 5    | ND    | 0.03  | 0.27  | 0.5   | 0.33  |
|          | 1-propanol, 2-methyl- | 0    | ND    | ND    | 0.26  | 0.14  | 0.38  |
|          |                       | 0.25 | ND    | ND    | 0.19  | 0.21  | 0.16  |
|          |                       | 0.5  | ND    | ND    | ND    | 0.22  | 0.14  |
|          |                       | 1    | ND    | ND    | 0.086 | 0.38  | 0.40  |
|          |                       | 5    | ND    | ND    | ND    | 0.55  | 0.60  |
|          | 1-pentanol            | 0    | 0.081 | 0.14  | 0.47  | 0.085 | 0.25  |
|          |                       | 0.25 | 0.14  | 0.28  | 0.56  | 0.26  | 0.26  |
|          |                       | 0.5  | 0.18  | 0.29  | 0.68  | 0.41  | 0.18  |
|          |                       | 1    | 0.17  | 0.64  | 0.90  | 0.43  | 0.50  |
|          |                       | 5    | 0.37  | 0.42  | 1.0   | 0.81  | 0.82  |
| Ketones  | 1-hexanol             | 0    | ND    | 0.034 | 0.59  | 0.1   | 0.33  |
|          |                       | 0.25 | 0.086 | 0.094 | 0.34  | 0.42  | 0.50  |
|          |                       | 0.5  | 0.11  | 0.087 | ND    | 0.48  | 0.37  |
|          |                       | 1    | 0.069 | 0.20  | 0.51  | 0.54  | 0.94  |
|          |                       | 5    | 0.16  | 0.13  | 0.44  | 1.6   | 2.2   |
|          | 1-octen-3-ol          | 0    | ND    | ND    | 0.25  | 0.14  | ND    |
|          |                       | 0.25 | ND    | ND    | 0.16  | 0.18  | 0.43  |
|          |                       | 0.5  | ND    | ND    | 0.23  | 0.32  | 0.15  |
|          |                       | 1    | ND    | ND    | 0.79  | 0.3   | 0.35  |
|          |                       | 5    | ND    | ND    | 1.5   | 1.3   | 0.66  |
|          | 1-hexanol, 2-ethyl-   | 0    | ND    | ND    | 0.36  | 0.098 | 0.36  |
|          |                       | 0.25 | 0.13  | 0.088 | 0.12  | 0.28  | 0.46  |
|          |                       | 0.5  | 0.16  | ND    | ND    | 0.38  | 0.093 |
|          |                       | 1    | ND    | 0.14  | 0.18  | 0.16  | 0.10  |
|          |                       | 5    | ND    | 0.096 | 0.27  | 0.24  | 0.18  |
|          | Acetone               | 0    | 0.74  | 0.4   | 0.42  | 0.023 | 0.07  |
|          |                       | 0.25 | 0.74  | 0.6   | 0.60  | 0.059 | 0.036 |
|          |                       | 0.5  | 0.58  | 0.76  | 0.63  | 0.095 | 0.035 |
|          |                       | 1    | 0.67  | 0.68  | 0.63  | 0.13  | 0.066 |
|          |                       | 5    | 0.77  | 0.56  | 0.86  | 0.47  | 0.36  |
|          | 2,3-butandione        | 0    | 0.50  | 1.1   | 15.8  | 0.48  | 1.1   |
|          |                       | 0.25 | 0.99  | 0.80  | 22.51 | 1.1   | 0.59  |
|          |                       | 0.5  | 0.74  | 0.98  | 15.9  | 2.5   | 0.53  |
|          |                       | 1    | 0.72  | 1.1   | 11.2  | 2.7   | 1.1   |

|                        |                         |      |       |       |        |       |       |
|------------------------|-------------------------|------|-------|-------|--------|-------|-------|
| Sulphurous Compounds   | 2-butanone              | 5    | 0.93  | 0.83  | 2.5    | 11.3  | 3.5   |
|                        |                         | 0    | 0.17  | 0.083 | ND     | ND    | ND    |
|                        |                         | 0.25 | 0.29  | 0.19  | ND     | ND    | ND    |
|                        |                         | 0.5  | 0.25  | 0.37  | ND     | ND    | ND    |
|                        |                         | 1    | 0.44  | 0.39  | 0.37   | ND    | ND    |
|                        |                         | 5    | 1.7   | 1.1   | 1.7    | ND    | ND    |
|                        |                         | 0    | 0.004 | ND    | 0.031  | 0.014 | 0.026 |
|                        |                         | 0.25 | 0.011 | ND    | ND     | 0.018 | 0.02  |
|                        |                         | 0.5  | 0.005 | ND    | 0.018  | 0.026 | 0.018 |
|                        |                         | 1    | 0.006 | ND    | ND     | ND    | 0.03  |
|                        |                         | 5    | 0.015 | ND    | 0.02   | 0.054 | 0.057 |
|                        |                         | 0    | ND    | ND    | 18.6   | 0.26  | 0.21  |
|                        | 2-butanone, 3-hydroxy-- | 0.25 | ND    | ND    | 15.1   | 3.5   | 0.63  |
|                        |                         | 0.5  | ND    | ND    | 11.6   | 0.95  | 0.19  |
|                        |                         | 1    | ND    | ND    | 13.4   | 2.8   | ND    |
|                        |                         | 5    | ND    | ND    | 0.81   | 17.0  | 1.0   |
|                        | 2-butanone, 4-hydroxy-  | 0    | ND    | ND    | 2.9    | 0.30  | 0.52  |
|                        |                         | 0.25 | ND    | ND    | 0.49   | 0.51  | 0.28  |
|                        |                         | 0.5  | ND    | ND    | 0.50   | 0.91  | 0.46  |
|                        |                         | 1    | ND    | ND    | ND     | 3.5   | 1.7   |
|                        |                         | 5    | ND    | ND    | ND     | 9.7   | 7.9   |
|                        |                         | 0    | 2.95  | 1.1   | 0.27   | 0.19  | 0.11  |
|                        |                         | 0.25 | 2.3   | 2.1   | 0.47   | 0.95  | 1.4   |
|                        |                         | 0.5  | 2.3   | 3.1   | 1.4    | 1.0   | 0.61  |
| Hydrocarbons (Alkanes) | Methanethiol            | 1    | 2.0   | 2.1   | 1.2    | 0.70  | 0.20  |
|                        |                         | 5    | 2.0   | 1.9   | 3.2    | 0.44  | 0.66  |
|                        |                         | 0    | 0.12  | 0.061 | 0.13   | 0.053 | 0.13  |
|                        |                         | 0.25 | 0.084 | 0.087 | 0.09   | 0.055 | 0.083 |
|                        | Dimethyl sulfide        | 0.5  | 0.09  | 0.089 | 0.12   | 0.081 | 0.074 |
|                        |                         | 1    | 0.11  | 0.12  | 0.12   | 0.086 | 0.12  |
|                        |                         | 5    | 0.22  | 0.12  | 0.14   | 0.15  | 0.19  |
|                        |                         | 0    | ND    | ND    | ND     | ND    | 0.029 |
|                        | Hexane                  | 0.25 | ND    | ND    | ND     | ND    | 0.023 |
|                        |                         | 0.5  | ND    | ND    | ND     | 0.023 | 0.031 |
|                        |                         | 1    | ND    | ND    | ND     | 0.036 | 0.045 |
|                        |                         | 5    | ND    | 0.026 | 0.0088 | 0.026 | 0.054 |
|                        | Heptane                 | 0    | ND    | ND    | 0.16   | 0.11  | 0.36  |
|                        |                         | 0.25 | ND    | ND    | 0.12   | 0.32  | 0.34  |
|                        |                         | 0.5  | ND    | 0.08  | 0.16   | 0.30  | 0.40  |
|                        |                         | 1    | ND    | 0.14  | 0.25   | 0.29  | 0.53  |
|                        |                         | 5    | ND    | 0.24  | 0.81   | 1.1   | 0.82  |
|                        |                         | 0    | ND    | ND    | ND     | 0.037 | 0.17  |
|                        | Octane                  | 0.25 | ND    | ND    | ND     | 0.14  | 0.15  |
|                        |                         | 0.5  | ND    | ND    | 0.046  | 0.21  | 0.29  |
|                        |                         | 1    | ND    | ND    | 0.017  | 0.17  | 0.32  |
|                        |                         | 5    | ND    | 0.11  | 0.10   | 0.17  | 0.33  |

|                 |      |      |      |      |      |      |
|-----------------|------|------|------|------|------|------|
| Total VOCs      | 0    | 30.3 | 12.9 | 46.4 | 5.9  | 16.1 |
|                 | 0.25 | 30.8 | 22.9 | 55.9 | 11.6 | 12.6 |
|                 | 0.5  | 29.0 | 35.2 | 53.2 | 12.4 | 9.2  |
|                 | 1    | 26.4 | 30.0 | 41.8 | 17.3 | 16.2 |
|                 | 5    | 36.9 | 27.8 | 44.2 | 57.1 | 28.0 |
| ND—Not Detected |      |      |      |      |      |      |
